# Supplementary material for: Using clinical variables and drug prescription data to control for confounding in outcome comparisons between hospitals
Source: BMC Health Serv Res. 2014 Oct 23;14:495. doi: 10.1186/s12913-014-0495-3 (PMC4209232; doi:10.1186/s12913-014-0495-3)
Supplement: Additional file 2: — Distribution of demographic characteristics, chronic conditions, clinical variables and drug consumption by type of hospitals - HF cohort. [file 12913_2014_495_MOESM2_ESM.xls]

## Sheet: Appendix B
Additional file 2. Distribution of demographic characteristics, chronic conditions, clinical variables and drug consumption by type of hospitals - HF cohort
Risk factor	Type of hospitals
	Public hospital corporations		Teaching hospitals		Private hospitals
	(No. 5141)		(No. 705)		(No. 502)
	n	%	n	%	n	%
Demographic characteristics	83.1 *	7.0 *	83.1 *	7.1 *	82.4 *	7.3 *
Age (mean, SD)
Gender (female)	3989	77.5919	545	77.305	391	77.8884
Previous conditions (from HIS)
Diabetes	339	6.59405	40	5.67376	27	5.37849
Nutritional deficiencies	13	0.252869	4	0.567376	1	0.199203
Obesity	19	0.369578	2	0.283688	2	0.398406
Blood disorders	260	5.05738	37	5.24823	25	4.98008
Dementias including Alzheimer's diseases	165	3.20949	15	2.12766	12	2.39044
Parkinson's disease	38	0.739156	11	1.56028	7	1.39442
Hemiplegia and other paralytic syndromes	18	0.350126	3	0.425532	1	0.199203
Rheumatic heart disease	23	0.447384	4	0.567376	3	0.59761
Hypertension	715	13.9078	94	13.3333	68	13.5458
Previous myocardial infarction	141	2.74266	17	2.41135	5	0.996016
Other forms of ischemic heart diseases	448	8.71426	70	9.92908	42	8.36653
Cardiomyopathy	42	0.816962	3	0.425532	5	0.996016
Conduction disorders and arrhythmias	406	7.8973	44	6.24113	29	5.77689
Heart failure	299	5.81599	35	4.96454	22	4.38247
Ill-defined descriptions or complications of heart disease	99	1.9257	9	1.2766	9	1.79283
Other heart conditions	69	1.34215	6	0.851064	7	1.39442
Cerebrovascular disease	457	8.88932	57	8.08511	47	9.36255
Vascular disease	122	2.37308	18	2.55319	14	2.78884
Chronic obstructive pulmonary disease (COPD)	287	5.58257	46	6.52482	33	6.57371
Chronic diseases (liver, pancreas, intestine)	53	1.03093	10	1.41844	8	1.59363
Chronic renal disease	191	3.71523	24	3.40426	17	3.38645
Rheumatoid arthritis and other inflammatory polyarthropathies	18	0.350126	3	0.425532	4	0.796813
Osteoporosis and other disorders of bone and cartilage	45	0.875316	7	0.992908	5	0.996016
Clinical data (from New Information System)
International Normalized Ratio (INR)
0.9-1.2	3937	76.5804	529	75.0355	368	73.3068
Out of range	703	13.6744	88	12.4823	64	12.749
Missing	501	9.74519	88	12.4823	70	13.9442
Drug consumptiona
Antiplatelet (3 month)	691	13.441	98	13.9007	62	12.3506
Anticoagulants (3 month)	200	3.89029	29	4.11348	9	1.79283
* Mean and standard deviation
a Treatment was defined as at least 1 prescription in the 3 months preceding the HF admission.
